# Supplementary material
Source: MDPI journal article supplement (https://www.mdpi.com/2077-1312/9/11/1254)
Supplement: s1 [file s1]

**Table S1.** Major and trace element concentrations of different depth in the sediment core PC15

| depth(cm) | major element(%) |                                |                                |      |      |                   |                  |      |                  |                               |      | trace element( $\mu\text{g/g}$ ) |     |     |      |
|-----------|------------------|--------------------------------|--------------------------------|------|------|-------------------|------------------|------|------------------|-------------------------------|------|----------------------------------|-----|-----|------|
|           | SiO <sub>2</sub> | Al <sub>2</sub> O <sub>3</sub> | Fe <sub>2</sub> O <sub>3</sub> | MgO  | CaO  | Na <sub>2</sub> O | K <sub>2</sub> O | MnO  | TiO <sub>2</sub> | P <sub>2</sub> O <sub>5</sub> | LOI  | Co                               | Ni  | Cu  | Ba   |
| 0-10      | 48.03            | 12.89                          | 11.60                          | 9.62 | 7.31 | 3.32              | 0.78             | 0.19 | 1.90             | 0.19                          | 3.52 | 70.9                             | 244 | 152 | 127  |
| 20-30     | 48.12            | 13.23                          | 11.55                          | 8.86 | 6.79 | 3.50              | 0.91             | 0.24 | 1.95             | 0.22                          | 4.14 | 72.0                             | 219 | 164 | 142  |
| 40-50     | 49.26            | 12.38                          | 11.57                          | 9.55 | 8.29 | 2.87              | 0.63             | 0.16 | 2.03             | 0.23                          | 2.29 | 64.8                             | 216 | 121 | 169  |
| 58-70     | 46.86            | 13.91                          | 12.35                          | 6.71 | 5.44 | 3.87              | 1.30             | 0.68 | 2.11             | 0.25                          | 5.76 | 123                              | 202 | 265 | 192  |
| 80-92     | 46.99            | 13.92                          | 12.20                          | 7.14 | 5.72 | 3.91              | 1.14             | 0.20 | 2.11             | 0.22                          | 5.60 | 79.0                             | 172 | 213 | 169  |
| 100-110   | 50.69            | 15.43                          | 9.17                           | 3.44 | 2.48 | 4.44              | 2.74             | 1.06 | 1.23             | 0.69                          | 7.84 | 153                              | 274 | 519 | 765  |
| 120-130   | 51.62            | 15.44                          | 8.48                           | 3.30 | 2.04 | 4.21              | 2.87             | 1.45 | 0.98             | 0.71                          | 8.08 | 202                              | 367 | 687 | 1084 |
| 140-150   | 51.42            | 15.34                          | 8.45                           | 3.31 | 1.97 | 4.45              | 3.03             | 1.46 | 0.99             | 0.67                          | 8.14 | 206                              | 330 | 694 | 1291 |
| 160-170   | 51.32            | 15.47                          | 8.41                           | 3.32 | 1.94 | 4.43              | 2.94             | 1.51 | 0.96             | 0.62                          | 8.21 | 215                              | 352 | 696 | 1395 |
| 180-190   | 51.68            | 15.48                          | 8.48                           | 3.38 | 1.90 | 4.33              | 2.93             | 1.49 | 0.96             | 0.65                          | 8.17 | 208                              | 325 | 655 | 1638 |
| 200-210   | 51.35            | 15.33                          | 8.38                           | 3.38 | 1.91 | 4.53              | 3.21             | 1.38 | 0.93             | 0.64                          | 8.19 | 208                              | 320 | 658 | 1526 |
| 220-230   | 52.32            | 15.75                          | 8.33                           | 3.44 | 2.07 | 4.16              | 2.86             | 1.26 | 0.95             | 0.70                          | 8.07 | 172                              | 296 | 637 | 1430 |
| 240-250   | 51.72            | 15.95                          | 8.01                           | 3.44 | 2.10 | 4.37              | 3.09             | 1.17 | 0.92             | 0.68                          | 8.07 | 151                              | 248 | 604 | 1427 |
| 260-270   | 52.83            | 15.85                          | 7.60                           | 3.29 | 1.93 | 4.25              | 3.26             | 1.15 | 0.85             | 0.68                          | 8.02 | 149                              | 252 | 630 | 1838 |
| 280-290   | 52.50            | 15.51                          | 7.44                           | 3.22 | 1.90 | 4.41              | 3.48             | 1.19 | 0.82             | 0.71                          | 8.13 | 155                              | 259 | 666 | 1938 |
| 300-310   | 52.57            | 15.57                          | 7.40                           | 3.24 | 1.83 | 4.37              | 3.41             | 1.19 | 0.80             | 0.66                          | 8.17 | 151                              | 263 | 657 | 2005 |
| 320-330   | 52.88            | 15.68                          | 7.41                           | 3.21 | 1.74 | 4.33              | 3.29             | 1.17 | 0.79             | 0.68                          | 8.35 | 150                              | 268 | 635 | 2031 |
| 340-350   | 52.91            | 15.45                          | 7.25                           | 3.15 | 1.77 | 4.37              | 3.37             | 1.20 | 0.78             | 0.72                          | 8.29 | 156                              | 284 | 626 | 1828 |
| 360-370   | 52.74            | 15.38                          | 7.21                           | 3.14 | 1.84 | 4.41              | 3.45             | 1.22 | 0.76             | 0.79                          | 8.28 | 162                              | 303 | 636 | 1747 |
| 380-390   | 52.50            | 15.69                          | 7.29                           | 3.22 | 1.89 | 4.31              | 3.23             | 1.30 | 0.76             | 0.80                          | 8.18 | 166                              | 302 | 629 | 1711 |
| 400-410   | 53.04            | 15.65                          | 7.32                           | 3.29 | 1.87 | 4.29              | 3.15             | 1.34 | 0.79             | 0.75                          | 8.22 | 171                              | 305 | 646 | 1772 |
| 420-430   | 52.93            | 15.56                          | 7.12                           | 3.17 | 1.93 | 4.26              | 3.19             | 1.37 | 0.76             | 0.81                          | 8.12 | 180                              | 300 | 658 | 1765 |
| 440-450   | 53.18            | 15.42                          | 7.09                           | 3.17 | 1.91 | 4.32              | 3.39             | 1.36 | 0.77             | 0.78                          | 8.00 | 172                              | 318 | 666 | 2084 |
| 460-470   | 53.12            | 15.45                          | 7.06                           | 3.08 | 1.99 | 4.30              | 3.49             | 1.40 | 0.77             | 0.83                          | 7.96 | 185                              | 299 | 615 | 1758 |
| 480-490   | 53.17            | 15.72                          | 7.09                           | 3.01 | 2.21 | 4.33              | 3.36             | 1.52 | 0.76             | 0.98                          | 7.78 | 191                              | 309 | 608 | 845  |

|         |       |       |      |      |      |      |      |      |      |      |      |     |     |     |     |
|---------|-------|-------|------|------|------|------|------|------|------|------|------|-----|-----|-----|-----|
| 500-510 | 52.44 | 15.65 | 7.10 | 2.93 | 2.34 | 4.22 | 3.12 | 1.59 | 0.74 | 1.08 | 8.11 | 191 | 357 | 559 | 514 |
| 520-530 | 52.11 | 15.65 | 7.18 | 2.91 | 2.43 | 4.29 | 3.27 | 1.68 | 0.73 | 1.13 | 8.06 | 197 | 386 | 561 | 377 |
| 540-550 | 51.89 | 15.84 | 7.31 | 2.90 | 2.70 | 4.11 | 2.98 | 1.70 | 0.73 | 1.25 | 7.86 | 188 | 388 | 555 | 391 |

**Table S2.** Rare earth element concentrations( $\mu\text{g/g}$ ) and characteristics parameters of different depth in the sediment core PC15

| depth(cm) | La   | Ce   | Pr   | Nd   | Sm   | Eu   | Gd   | Tb   | Dy   | Ho   | Er   | Tm   | Yb   | Lu   | Y    | $\Sigma\text{Ce}/\Sigma\text{Y}^*$ | $\delta\text{Ce}^{**}$ | $\delta\text{Eu}^{**}$ | $\Sigma\text{REY}$ |
|-----------|------|------|------|------|------|------|------|------|------|------|------|------|------|------|------|------------------------------------|------------------------|------------------------|--------------------|
| 0-10      | 12.1 | 26.7 | 3.99 | 18.6 | 5.03 | 1.56 | 6.24 | 0.90 | 4.81 | 1.09 | 2.48 | 0.36 | 2.18 | 0.32 | 24.1 | 1.60                               | 0.93                   | 1.17                   | 110.46             |
| 20-30     | 16.6 | 30.1 | 5.23 | 25.0 | 6.31 | 1.81 | 7.24 | 1.08 | 5.70 | 1.28 | 3.09 | 0.44 | 2.62 | 0.40 | 30.9 | 1.61                               | 0.79                   | 1.14                   | 137.80             |
| 40-50     | 14.6 | 25.6 | 4.59 | 22.1 | 5.91 | 1.75 | 7.00 | 1.04 | 5.66 | 1.20 | 3.03 | 0.43 | 2.63 | 0.36 | 29.4 | 1.47                               | 0.76                   | 1.15                   | 125.30             |
| 58-70     | 26.2 | 57.9 | 7.70 | 34.9 | 8.56 | 2.36 | 9.46 | 1.52 | 7.92 | 1.67 | 4.38 | 0.62 | 3.86 | 0.56 | 39.1 | 1.99                               | 1.00                   | 1.12                   | 206.71             |
| 80-92     | 17.6 | 33.4 | 5.35 | 24.2 | 6.44 | 1.83 | 7.31 | 1.12 | 5.89 | 1.25 | 2.97 | 0.43 | 2.65 | 0.38 | 29.6 | 1.72                               | 0.84                   | 1.13                   | 140.42             |
| 100-110   | 79.6 | 105  | 22.0 | 96.7 | 22.8 | 5.35 | 21.4 | 4.00 | 22.1 | 4.79 | 12.7 | 1.82 | 11.6 | 1.74 | 125  | 1.62                               | 0.61                   | 1.04                   | 536.60             |
| 120-130   | 89.1 | 120  | 24.8 | 110  | 25.8 | 5.96 | 23.8 | 4.52 | 24.8 | 5.63 | 14.9 | 2.16 | 13.1 | 1.89 | 145  | 1.59                               | 0.62                   | 1.03                   | 611.46             |
| 140-150   | 87.0 | 117  | 24.6 | 109  | 25.6 | 6.15 | 24.6 | 4.40 | 24.7 | 5.44 | 14.4 | 2.03 | 13.1 | 1.95 | 143  | 1.58                               | 0.62                   | 1.05                   | 602.97             |
| 160-170   | 86.8 | 129  | 24.1 | 105  | 25.2 | 5.85 | 23.4 | 4.36 | 24.2 | 5.32 | 14.1 | 1.94 | 12.5 | 1.81 | 137  | 1.67                               | 0.69                   | 1.03                   | 600.58             |
| 180-190   | 89.3 | 131  | 24.7 | 109  | 25.3 | 6.01 | 24.1 | 4.41 | 24.3 | 5.34 | 13.8 | 2.06 | 12.2 | 1.90 | 140  | 1.69                               | 0.68                   | 1.04                   | 613.42             |
| 200-210   | 88.6 | 125  | 24.5 | 107  | 25.2 | 6.01 | 24.0 | 4.45 | 24.6 | 5.42 | 14.1 | 2.08 | 12.9 | 1.92 | 141  | 1.63                               | 0.66                   | 1.05                   | 606.78             |
| 220-230   | 94.3 | 112  | 26.2 | 115  | 27.9 | 6.41 | 25.7 | 4.80 | 26.9 | 5.82 | 15.4 | 2.23 | 14.2 | 2.02 | 154  | 1.52                               | 0.55                   | 1.03                   | 632.88             |
| 240-250   | 93.6 | 100  | 26.0 | 117  | 27.4 | 6.36 | 25.4 | 4.70 | 25.7 | 5.69 | 15.0 | 2.19 | 13.5 | 1.99 | 150  | 1.52                               | 0.50                   | 1.03                   | 614.53             |
| 260-270   | 93.9 | 96.5 | 26.8 | 118  | 28.7 | 6.51 | 26.0 | 4.95 | 26.8 | 5.94 | 15.6 | 2.24 | 13.8 | 2.06 | 154  | 1.47                               | 0.47                   | 1.02                   | 621.80             |
| 280-290   | 98.6 | 97.4 | 27.9 | 122  | 28.9 | 6.94 | 27.8 | 5.08 | 27.7 | 6.06 | 16.4 | 2.37 | 14.7 | 2.22 | 164  | 1.43                               | 0.45                   | 1.05                   | 648.07             |
| 300-310   | 91.4 | 96.0 | 26.3 | 115  | 26.9 | 6.39 | 25.6 | 4.77 | 25.9 | 5.80 | 15.3 | 2.20 | 13.8 | 2.05 | 150  | 1.47                               | 0.48                   | 1.04                   | 607.41             |
| 320-330   | 96.2 | 99.5 | 27.6 | 122  | 29.0 | 6.82 | 27.3 | 5.03 | 27.1 | 6.04 | 15.7 | 2.30 | 14.1 | 2.09 | 159  | 1.47                               | 0.47                   | 1.04                   | 639.78             |
| 340-350   | 97.6 | 98.5 | 28.6 | 127  | 29.7 | 7.06 | 28.2 | 5.18 | 28.5 | 6.20 | 16.9 | 2.40 | 15.0 | 2.25 | 170  | 1.41                               | 0.46                   | 1.05                   | 663.09             |
| 360-370   | 103  | 97.7 | 29.2 | 132  | 31.1 | 7.20 | 28.8 | 5.33 | 30.0 | 6.58 | 18.2 | 2.55 | 15.7 | 2.42 | 184  | 1.36                               | 0.44                   | 1.03                   | 693.78             |
| 380-390   | 105  | 102  | 29.7 | 131  | 31.1 | 7.25 | 29.0 | 5.40 | 30.3 | 6.77 | 17.8 | 2.56 | 15.7 | 2.41 | 184  | 1.38                               | 0.45                   | 1.04                   | 699.99             |
| 400-410   | 101  | 104  | 28.6 | 128  | 29.4 | 6.80 | 27.2 | 5.18 | 28.1 | 6.23 | 16.3 | 2.39 | 14.7 | 2.22 | 169  | 1.47                               | 0.47                   | 1.03                   | 669.12             |
| 420-430   | 104  | 103  | 30.3 | 135  | 32.2 | 7.33 | 29.3 | 5.58 | 30.2 | 6.76 | 18.4 | 2.58 | 16.1 | 2.42 | 185  | 1.39                               | 0.45                   | 1.02                   | 708.17             |
| 440-450   | 104  | 104  | 30.5 | 136  | 32.6 | 7.38 | 29.5 | 5.50 | 30.7 | 6.68 | 17.8 | 2.58 | 15.4 | 2.31 | 182  | 1.42                               | 0.45                   | 1.02                   | 706.95             |
| 460-470   | 110  | 108  | 30.9 | 140  | 32.0 | 7.52 | 30.1 | 5.69 | 31.5 | 6.89 | 18.2 | 2.68 | 16.2 | 2.46 | 186  | 1.43                               | 0.45                   | 1.04                   | 728.14             |
| 480-490   | 112  | 107  | 31.8 | 146  | 34.5 | 7.89 | 31.6 | 6.11 | 33.6 | 7.47 | 20.1 | 2.84 | 17.2 | 2.63 | 195  | 1.39                               | 0.44                   | 1.03                   | 755.74             |
| 500-510   | 128  | 118  | 36.2 | 164  | 38.9 | 8.85 | 35.4 | 6.87 | 37.9 | 8.34 | 22.5 | 3.22 | 18.8 | 2.90 | 222  | 1.38                               | 0.42                   | 1.02                   | 851.88             |

|         |     |     |      |     |      |      |      |      |      |      |      |      |      |      |     |      |      |      |        |
|---------|-----|-----|------|-----|------|------|------|------|------|------|------|------|------|------|-----|------|------|------|--------|
| 520-530 | 133 | 121 | 37.0 | 169 | 39.1 | 8.86 | 35.4 | 6.89 | 37.6 | 8.30 | 21.5 | 3.13 | 18.6 | 2.89 | 218 | 1.44 | 0.42 | 1.02 | 860.27 |
| 540-550 | 130 | 120 | 36.1 | 165 | 39.0 | 8.53 | 34.1 | 6.58 | 36.4 | 8.19 | 21.7 | 3.11 | 18.0 | 2.83 | 217 | 1.43 | 0.43 | 1.00 | 846.54 |

\*:  $\Sigma\text{Ce} = \text{La} + \text{Ce} + \text{Pr} + \text{Nd} + \text{Sm} + \text{Eu}$ ;  $\Sigma\text{Y} = \text{Gd} + \text{Tb} + \text{Dy} + \text{Ho} + \text{Er} + \text{Tm} + \text{Yb} + \text{Lu} + \text{Y}$ ;

\*\* :  $\delta\text{Ce} = 2\text{Ce}_\text{N} / (\text{La}_\text{N} + \text{Pr}_\text{N})$ ;  $\delta\text{Eu} = 2\text{Eu}_\text{N} / (\text{Sm}_\text{N} + \text{Gd}_\text{N})$ . The North American Shale Composition was followed by [Ref. \[25\]](#).
